# Supplementary material for: Intestinal Epithelial Cells Adapt to Chronic Inflammation through Partial Genetic Reprogramming
Source: Cancers (Basel). 2023 Feb 3;15(3):973. doi: 10.3390/cancers15030973 (PMC9913703; doi:10.3390/cancers15030973)
Supplement: Supplementary file 1 [file cancers-15-00973-s001.zip › cancers-2188031-Supplementary File S1.pdf]

## **Intestinal epithelial cells adapt to chronic inflammation through partial genetic reprogramming.**

Guillaume Collin, Jean-Philippe Foy, Nicolas Aznar, Nicolas Rama, Anne Wierinckx, Pierre Saintigny, Alain Puisieux, Stéphane Ansieau.

### **Supplementary Materiel and Methods**

#### ***In silico* analysis for validation of the experimental OSAP**

Raw data from CEL files were processed using quantile normalization and the robust multi-array average (RMA) algorithm, and were log2 transformed<sup>1</sup>. In order to improve the precision and accuracy the probe set estimates used for our analysis<sup>2,3</sup>, updated Affymetrix probe set definitions of the CDF file version 18 (released on Jan 23, 2014) available on the BrainArray web database were downloaded. Gene annotation corresponding to the NCBI (“Entrez Gene”)<sup>4</sup> was used. Hierarchical Clustering Analysis and Principal Component Analysis (PCA) were performed using expression data in order to provide an overview of the data, especially to visualize the distribution of both samples according to the expression of OSAP. Unsupervised hierarchical clustering using the Pearson correlation and Ward linkage method was computed. The 2 first components of PCA were used. The single-sample GSEA (ssGSEA) projection methodology from GenePattern<sup>5</sup>, an extension of GSEA that enabled the computing of separate enrichment scores for sample/signature pair (e.g., tumor versus normal), was also used. The gene expression values for a given sample were rank-normalized, and an enrichment score was produced using the Empirical Cumulative Distribution Functions (ECDF) of the genes in the signature and the remaining genes<sup>6,7</sup>. Before running ssGSEA, we used the “Collapse Dataset” module from GenePAtern, in order to collapse all probe set

expression values for a given gene into a single expression value (according to the median). Using the human expression datasets downloaded from public repositories, the OSAP scores were calculated for each sample. The immune signature<sup>8</sup> and the two intestinal stem cell signatures Lgr5-GFP<sup>high</sup> and EphB2<sup>high</sup><sup>9</sup> were similarly scored in each sample and the correlation between these signatures and the assessed OSAP was assessed using a Spearman correlation. The Spearman Correlation Coefficient (r) was also estimated to measure the strength of an association between two continuous variables. The Spearman correlation coefficient r can take a range of values from +1 (positive association) to -1 (negative association). Stem-like signature was defined on the basis of the 177 genes enriched in the Stem-like (expression value >0.2) subgroup with respect to the inflammatory, goblet-like, enterocyte and TA molecular subgroups.

### **Nuclear extractions**

Cells were washed with 1X PBS and resuspended in 200  $\mu$ L of a 10 mM Hepes pH 7.5, 10 mM KCl, 0.1 mM EDTA, 0.5% NP40 buffer supplemented with protease inhibitors (Roche). After 20 min in ice, cells were pelleted by centrifugation and the supernatant defined as the cytoplasmic fraction. After an additional wash in the extraction buffer, cell pellets were resuspended in 100  $\mu$ L of a 20 mM Hepes pH 7.5, 400 mM NaCl, 1 mM EDTA supplemented with protease inhibitors. After 30 min in ice, samples were sonicated and cleared by centrifugation. Supernatants constitute the nuclear fraction.  $\alpha$ -tubulin and phospho-Serine 10 histone H3 were used as cytoplasmic and nuclear protein control, respectively.

### List of primers used to assess gene expression by qRT-PCR

| ID             | Name          | Sequence                       |
|----------------|---------------|--------------------------------|
| NM_000041      | <i>APOE</i>   | 5'-TGGACAAGTCTGGGATCCTT-3'     |
|                |               | 5'-CATCTTCCTGCCTGTGATTG-3'     |
| NM_014298      | <i>QPRT</i>   | 5'-GTCACCATGGACGCTGAA-3'       |
|                |               | 5'-GAGCCAGCTGTCACCAG-3'        |
| NM_000194.1    | <i>HPRT1</i>  | 5'-TGACCTTGATTTATTTTGCATACC-3' |
|                |               | 5'-CGAGCAAGACGTTTCAGTCCT-3'    |
| NM_000474.3    | <i>TWIST1</i> | 5'-GGCTCAGCTACGCCTCTC-3'       |
|                |               | 5'-CCTTCTCTGGAAACAATGACATCT-3' |
| NM_057179      | <i>TWIST2</i> | 5'-CATGTCCGCCTCCCACTA-3'       |
|                |               | 5'-GCATCATTGAGAATCTCCTCCT-3'   |
| NM_001128128.1 | <i>ZEB1</i>   | 5'-AACTGCTGGGAGGATGACAC-3'     |
|                |               | 5'-TCCTGCTTCATCTGCCTGA-3'      |
| NM_014795.2    | <i>ZEB2</i>   | 5'-AAGCCAGGGACAGATCAGC-3'      |
|                |               | 5'-GCCACACTCTGTGCATTTGA-3'     |
| NM_005985      | <i>SNAI1</i>  | 5'-GCTGCAGGACTCTAATCCAGA-3'    |
|                |               | 5'-ATCTCCGGAGGTGGGATG-3'       |
| NM_003068      | <i>SNAI2</i>  | 5'-TGGTTGCTTCAAGGACACAT-3'     |
|                |               | 5'-GTTGCAGTGAGGGCAAGAA-3'      |
| NM_011546      | <i>Zeb1</i>   | 5'-GCCAGCAGTCATGATGAAAA-3'     |
|                |               | 5'-TATCACAATACGGGCAGGTG-3'     |
| NM_015753      | <i>Zeb2</i>   | 5'-CCAGAGGAAACAAGGATTTAG-3'    |
|                |               | 5'-AGGCCTGACATGTAGTCTTGTG-3'   |

### Supplementary references

1. Irizarry RA., Hobbs B., Collin F., Beazer-Barclay YD., Antonellis KJ., Scherf U., et al. Exploration, normalization, and summaries of high density oligonucleotide array probe level data. *Biostatistics* 2003;**4**(2):249–64. Doi: 10.1093/biostatistics/4.2.249.
2. Dai M., Wang P., Boyd AD., Kostov G., Athey B., Jones EG., et al. Evolving gene/transcript definitions significantly alter the interpretation of GeneChip data. *Nucleic Acids Res* 2005;**33**(20):e175. Doi: 10.1093/nar/gni179.
3. Sandberg R., Larsson O. Improved precision and accuracy for microarrays using updated probe set definitions. *BMC Bioinformatics* 2007;**8**:48. Doi: 10.1186/1471-2105-8-48.
4. Maglott D., Ostell J., Pruitt KD., Tatusova T. Entrez Gene: gene-centered information at NCBI. *Nucleic Acids Res* 2005;**33**(Database issue):D54–58. Doi: 10.1093/nar/gki031.
5. Reich M., Liefeld T., Gould J., Lerner J., Tamayo P., Mesirov JP. GenePattern 2.0. *Nat Genet* 2006;**38**(5):500–1. Doi: 10.1038/ng0506-500.

6. Barbie DA., Tamayo P., Boehm JS., Kim SY., Moody SE., Dunn IF., et al. Systematic RNA interference reveals that oncogenic KRAS-driven cancers require TBK1. *Nature* 2009;**462**(7269):108–12. Doi: 10.1038/nature08460.
7. Subramanian A., Tamayo P., Mootha VK., Mukherjee S., Ebert BL., Gillette MA., et al. Gene set enrichment analysis: a knowledge-based approach for interpreting genome-wide expression profiles. *Proc Natl Acad Sci U S A* 2005;**102**(43):15545–50. Doi: 10.1073/pnas.0506580102.
8. Yoshihara K., Shahmoradgoli M., Martínez E., Vegesna R., Kim H., Torres-Garcia W., et al. Inferring tumour purity and stromal and immune cell admixture from expression data. *Nat Commun* 2013;**4**:2612. Doi: 10.1038/ncomms3612.
9. Merlos-Suárez A., Barriga FM., Jung P., Iglesias M., Céspedes MV., Rossell D., et al. The intestinal stem cell signature identifies colorectal cancer stem cells and predicts disease relapse. *Cell Stem Cell* 2011;**8**(5):511–24. Doi: 10.1016/j.stem.2011.02.020.

## Supplementary Figure legend

### Figure S1:

#### A. Confirmation of the ectopic expression of murine *Zeb* transcripts by qRT-PCR

Analysis of the ectopic expression of murine *Zeb1* and *Zeb2* in transduced HCEC-hTERT cells. Left panel: ectopic expression was assessed by qRT-PCR (Ct values are presented). Student's t-test, mean and SD of one experiment performed in triplicates are shown. Right panels: analysis of ectopic ZEB1 or ZEB2 protein by Western blot. Immortalized human mammary epithelial cells transduced with *Zeb2* were used as a positive protein detection control (\*).

#### B. NF- $\kappa$ B is aberrantly activated in parental HCEC-hTERT cells

Analysis of the subcellular distribution of p65 NF- $\kappa$ B (p65) in parental HCEC-hTERT cells as assessed by Western blot. The significant detection of p65 in the nuclear compartment indicates an elevated NF- $\kappa$ B activity level at the steady state. Distribution of  $\alpha$ -tubulin and phospho-Serine 10 histone H3 (PSer10-H3) is used as internal controls of the quality of the cytoplasmic and nuclear fractionation. C: cytoplasmic compartment, N: nuclear compartment.

### Figure S2. Several OSAP-associated proteins contribute to cell adaptation to stress

(A) Ectopic expression of *QPRT* or *APOE* facilitates the escape from chronic inflammation-induced (+ AMS, left panel) or chemical peroxide-induced (+ TBHP, right panel) senescence, as assessed in a crystal violet assay (top panels). (B) Analysis of ectopically produced QPRT

and APOE proteins in HCEC-hTERT cells transduced with *APOE* or *QPRT* respectively by Western-blot.

**Table S1:** Enriched GOBP pathways from OSAP down-regulated genes

**Table S2:** Enriched GOBP pathways from OSAP up-regulated genes

A.

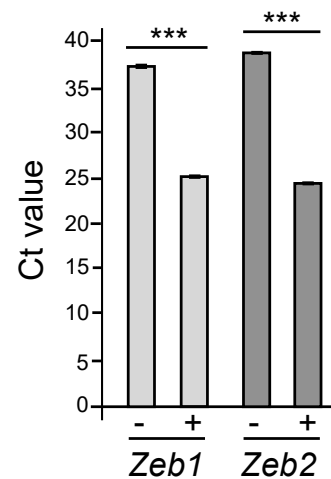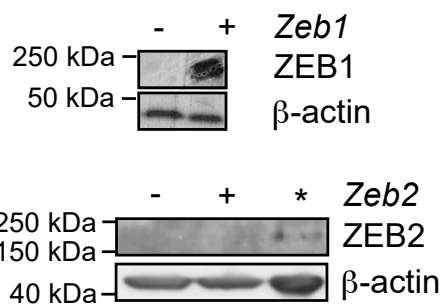

B.

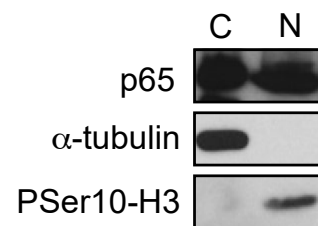

Figure S1

**A**

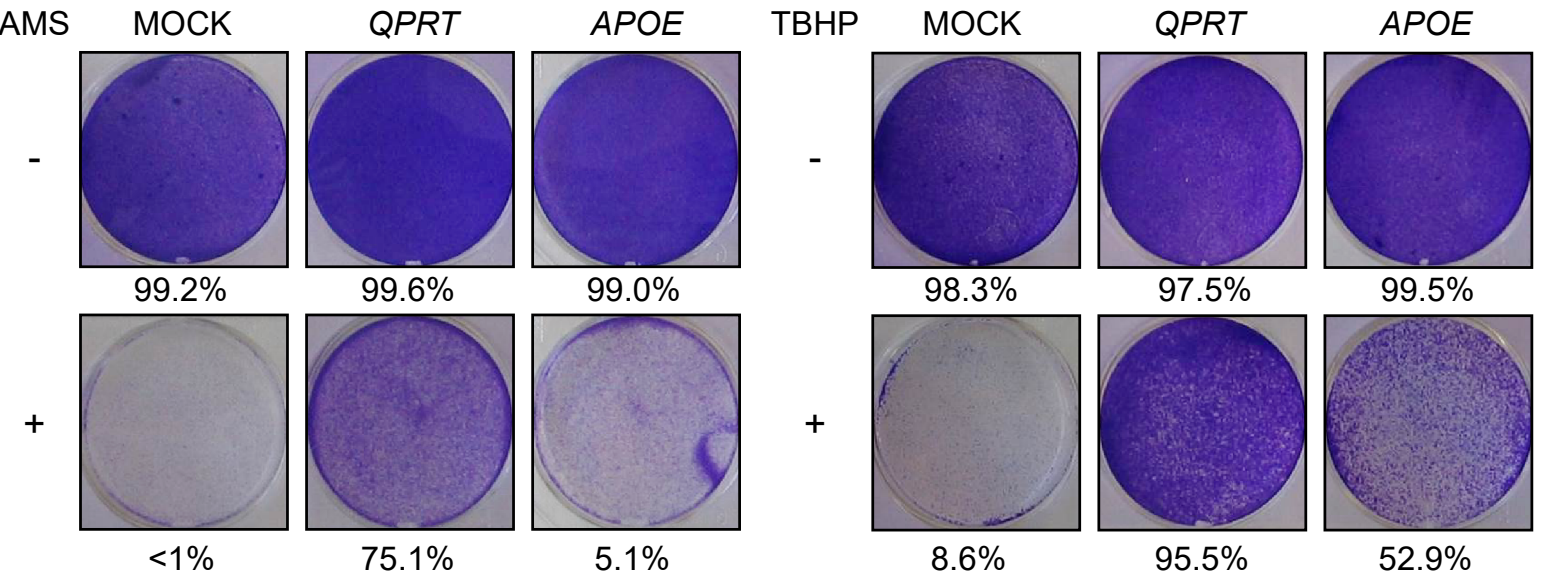

**B**

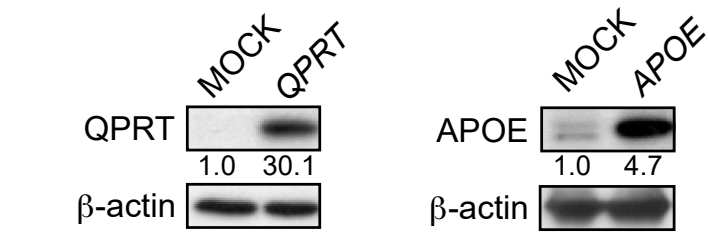

Figure S2

Table S1

|                                                                                          | Description                                                                              | logRatio  | p.adjust |
|------------------------------------------------------------------------------------------|------------------------------------------------------------------------------------------|-----------|----------|
| GOBP_RESPONSE_TO_MOLECULE_OF_BACTERIAL_ORIGIN                                            | GOBP_RESPONSE_TO_MOLECULE_OF_BACTERIAL_ORIGIN                                            | 354/17872 | 1.83E-06 |
| GOBP_CYTOKINE_MEDIATED_SIGNALING_PATHWAY                                                 | GOBP_CYTOKINE_MEDIATED_SIGNALING_PATHWAY                                                 | 485/17872 | 1.42E-05 |
| GOBP_CELLULAR_RESPONSE_TO_MOLECULE_OF_BACTERIAL_ORIGIN                                   | GOBP_CELLULAR_RESPONSE_TO_MOLECULE_OF_BACTERIAL_ORIGIN                                   | 229/17872 | 1.55E-05 |
| GOBP_CELLULAR_RESPONSE_TO_BIOTIC_STIMULUS                                                | GOBP_CELLULAR_RESPONSE_TO_BIOTIC_STIMULUS                                                | 256/17872 | 2.50E-05 |
| GOBP_I_KAPPA_B_KINASE_NF_KAPPA_B_SIGNALING                                               | GOBP_I_KAPPA_B_KINASE_NF_KAPPA_B_SIGNALING                                               | 288/17872 | 4.46E-05 |
| GOBP_NEUTROPHIL_CHEMOTAXIS                                                               | GOBP_NEUTROPHIL_CHEMOTAXIS                                                               | 105/17872 | 9.73E-05 |
| GOBP_LEUKOCYTE_CHEMOTAXIS                                                                | GOBP_LEUKOCYTE_CHEMOTAXIS                                                                | 236/17872 | 1.57E-04 |
| GOBP_GNANULOCYTE_CHEMOTAXIS                                                              | GOBP_GNANULOCYTE_CHEMOTAXIS                                                              | 127/17872 | 1.57E-04 |
| GOBP_NEUTROPHIL_MIGRATION                                                                | GOBP_NEUTROPHIL_MIGRATION                                                                | 128/17872 | 1.57E-04 |
| GOBP_LEUKOCYTE_MIGRATION                                                                 | GOBP_LEUKOCYTE_MIGRATION                                                                 | 385/17872 | 1.57E-04 |
| GOBP_CHRONIC_INFLAMMATORY_RESPONSE                                                       | GOBP_CHRONIC_INFLAMMATORY_RESPONSE                                                       | 17/17872  | 2.36E-04 |
| GOBP_GNANULOCYTE_MIGRATION                                                               | GOBP_GNANULOCYTE_MIGRATION                                                               | 154/17872 | 2.99E-04 |
| GOBP_POSITIVE_REGULATION_OF_NF_KAPPA_B_TRANSCRIPTION_FACTOR_ACTIVITY                     | GOBP_POSITIVE_REGULATION_OF_NF_KAPPA_B_TRANSCRIPTION_FACTOR_ACTIVITY                     | 154/17872 | 2.99E-04 |
| GOBP_REGULATION_OF_DNA_BINDING_TRANSCRIPTION_FACTOR_ACTIVITY                             | GOBP_REGULATION_OF_DNA_BINDING_TRANSCRIPTION_FACTOR_ACTIVITY                             | 451/17872 | 3.21E-04 |
| GOBP_ANTIMICROBIAL_HUMORAL_IMMUNE_RESPONSE_MEDIATED_BY_ANTIMICROBIAL_PEPTIDE             | GOBP_ANTIMICROBIAL_HUMORAL_IMMUNE_RESPONSE_MEDIATED_BY_ANTIMICROBIAL_PEPTIDE             | 79/17872  | 4.83E-04 |
| GOBP_CELL_CHEMOTAXIS                                                                     | GOBP_CELL_CHEMOTAXIS                                                                     | 315/17872 | 4.88E-04 |
| GOBP_RESPONSE_TO_CHEMOKINE                                                               | GOBP_RESPONSE_TO_CHEMOKINE                                                               | 96/17872  | 9.26E-04 |
| GOBP_MYELOID_LEUKOCYTE_MIGRATION                                                         | GOBP_MYELOID_LEUKOCYTE_MIGRATION                                                         | 230/17872 | 1.52E-03 |
| GOBP_ANTIMICROBIAL_HUMORAL_RESPONSE                                                      | GOBP_ANTIMICROBIAL_HUMORAL_RESPONSE                                                      | 123/17872 | 2.20E-03 |
| GOBP_TOLL_LIKE_RECEPTOR_SIGNALING_PATHWAY                                                | GOBP_TOLL_LIKE_RECEPTOR_SIGNALING_PATHWAY                                                | 126/17872 | 2.30E-03 |
| GOBP_POSITIVE_REGULATION_OF_DNA_BINDING_TRANSCRIPTION_FACTOR_ACTIVITY                    | GOBP_POSITIVE_REGULATION_OF_DNA_BINDING_TRANSCRIPTION_FACTOR_ACTIVITY                    | 264/17872 | 2.52E-03 |
| GOBP_HUMORAL_IMMUNE_RESPONSE                                                             | GOBP_HUMORAL_IMMUNE_RESPONSE                                                             | 312/17872 | 5.16E-03 |
| GOBP_POSITIVE_REGULATION_OF_HEPATOCYTE_PROLIFERATION                                     | GOBP_POSITIVE_REGULATION_OF_HEPATOCYTE_PROLIFERATION                                     | 10/17872  | 5.16E-03 |
| GOBP_REGULATION_OF_CHRONIC_INFLAMMATORY_RESPONSE                                         | GOBP_REGULATION_OF_CHRONIC_INFLAMMATORY_RESPONSE                                         | 10/17872  | 5.16E-03 |
| GOBP_LIPOPOLYSACCHARIDE_MEDIATED_SIGNALING_PATHWAY                                       | GOBP_LIPOPOLYSACCHARIDE_MEDIATED_SIGNALING_PATHWAY                                       | 62/17872  | 5.53E-03 |
| GOBP_POSITIVE_REGULATION_OF_CELL_CELL_ADHESION_MEDIATED_BY_CADHERIN                      | GOBP_POSITIVE_REGULATION_OF_CELL_CELL_ADHESION_MEDIATED_BY_CADHERIN                      | 11/17872  | 5.71E-03 |
| GOBP_INTERLEUKIN_6_PRODUCTION                                                            | GOBP_INTERLEUKIN_6_PRODUCTION                                                            | 172/17872 | 5.71E-03 |
| GOBP_POSITIVE_REGULATION_OF_MONONUCLEAR_CELL_MIGRATION                                   | GOBP_POSITIVE_REGULATION_OF_MONONUCLEAR_CELL_MIGRATION                                   | 66/17872  | 5.95E-03 |
| GOBP_POSITIVE_REGULATION_OF_HAIR_FOLLICLE_DEVELOPMENT                                    | GOBP_POSITIVE_REGULATION_OF_HAIR_FOLLICLE_DEVELOPMENT                                    | 12/17872  | 6.12E-03 |
| GOBP_PATTERN_RECOGNITION_RECEPTOR_SIGNALING_PATHWAY                                      | GOBP_PATTERN_RECOGNITION_RECEPTOR_SIGNALING_PATHWAY                                      | 180/17872 | 6.12E-03 |
| GOBP_POSITIVE_REGULATION_OF_CHEMOKINE_PRODUCTION                                         | GOBP_POSITIVE_REGULATION_OF_CHEMOKINE_PRODUCTION                                         | 70/17872  | 6.40E-03 |
| GOBP_REGULATION_OF_NUCLEOTIDE_BINDING_OLGOMERIZATION_DOMAIN_CONTAINING_SIGNALING_PATHWAY | GOBP_REGULATION_OF_NUCLEOTIDE_BINDING_OLGOMERIZATION_DOMAIN_CONTAINING_SIGNALING_PATHWAY | 13/17872  | 6.58E-03 |
| GOBP_POSITIVE_REGULATION_OF_I_KAPPA_B_KINASE_NF_KAPPA_B_SIGNALING                        | GOBP_POSITIVE_REGULATION_OF_I_KAPPA_B_KINASE_NF_KAPPA_B_SIGNALING                        | 188/17872 | 6.58E-03 |
| GOBP_REGULATION_OF_SECONDARY_METABOLIC_PROCESS                                           | GOBP_REGULATION_OF_SECONDARY_METABOLIC_PROCESS                                           | 14/17872  | 7.13E-03 |
| GOBP_REGULATION_OF_VASCULAR_WOUND_HEALING                                                | GOBP_REGULATION_OF_VASCULAR_WOUND_HEALING                                                | 14/17872  | 7.13E-03 |
| GOBP_REGULATION_OF_HEPATOCYTE_PROLIFERATION                                              | GOBP_REGULATION_OF_HEPATOCYTE_PROLIFERATION                                              | 15/17872  | 7.99E-03 |
| GOBP_L_GLUTAMATE_IMPORT_ACROSS_PLASMA_MEMBRANE                                           | GOBP_L_GLUTAMATE_IMPORT_ACROSS_PLASMA_MEMBRANE                                           | 16/17872  | 8.80E-03 |
| GOBP_RESPONSE_TO_VIRUS                                                                   | GOBP_RESPONSE_TO_VIRUS                                                                   | 391/17872 | 8.80E-03 |
| GOBP_REGULATION_OF_INFLAMMATORY_RESPONSE                                                 | GOBP_REGULATION_OF_INFLAMMATORY_RESPONSE                                                 | 397/17872 | 9.20E-03 |
| GOBP_LEUKOCYTE_MIGRATION_INVOLVED_IN_INFLAMMATORY_RESPONSE                               | GOBP_LEUKOCYTE_MIGRATION_INVOLVED_IN_INFLAMMATORY_RESPONSE                               | 19/17872  | 1.11E-02 |
| GOBP_REGULATION_OF_HAIR_FOLLICLE_DEVELOPMENT                                             | GOBP_REGULATION_OF_HAIR_FOLLICLE_DEVELOPMENT                                             | 19/17872  | 1.11E-02 |
| GOBP_REGULATION_OF_INNATE_IMMUNE_RESPONSE                                                | GOBP_REGULATION_OF_INNATE_IMMUNE_RESPONSE                                                | 230/17872 | 1.11E-02 |
| GOBP_REGULATION_OF_CYSINE_TYPE_ENDOPEPTIDASE_ACTIVITY                                    | GOBP_REGULATION_OF_CYSINE_TYPE_ENDOPEPTIDASE_ACTIVITY                                    | 232/17872 | 1.11E-02 |
| GOBP_POSITIVE_REGULATION_OF_JNK_CASCADE                                                  | GOBP_POSITIVE_REGULATION_OF_JNK_CASCADE                                                  | 95/17872  | 1.11E-02 |
| GOBP_RESPONSE_TO_MURAMYLDIPEPTIDE                                                        | GOBP_RESPONSE_TO_MURAMYLDIPEPTIDE                                                        | 30/17872  | 1.11E-02 |
| GOBP_TOLL_LIKE_RECEPTOR_3_SIGNALING_PATHWAY                                              | GOBP_TOLL_LIKE_RECEPTOR_3_SIGNALING_PATHWAY                                              | 20/17872  | 1.11E-02 |
| GOBP_POSITIVE_REGULATION_OF_INTERLEUKIN_6_PRODUCTION                                     | GOBP_POSITIVE_REGULATION_OF_INTERLEUKIN_6_PRODUCTION                                     | 97/17872  | 1.11E-02 |
| GOBP_CHEMOKINE_PRODUCTION                                                                | GOBP_CHEMOKINE_PRODUCTION                                                                | 98/17872  | 1.12E-02 |
| GOBP_REGULATION_OF_CELL_CELL_ADHESION_MEDIATED_BY_CADHERIN                               | GOBP_REGULATION_OF_CELL_CELL_ADHESION_MEDIATED_BY_CADHERIN                               | 21/17872  | 1.17E-02 |
| GOBP_RESPONSE_TO_TUMOR_NECROSIS_FACTOR                                                   | GOBP_RESPONSE_TO_TUMOR_NECROSIS_FACTOR                                                   | 248/17872 | 1.23E-02 |
| GOBP_VASCULAR_WOUND_HEALING                                                              | GOBP_VASCULAR_WOUND_HEALING                                                              | 22/17872  | 1.23E-02 |
| GOBP_LIVER_MORPHOGENESIS                                                                 | GOBP_LIVER_MORPHOGENESIS                                                                 | 23/17872  | 1.31E-02 |
| GOBP_TUMOR_NECROSIS_FACTOR_MEDIATED_SIGNALING_PATHWAY                                    | GOBP_TUMOR_NECROSIS_FACTOR_MEDIATED_SIGNALING_PATHWAY                                    | 107/17872 | 1.31E-02 |
| GOBP_SECONDARY_METABOLITE_BIOSYNTHETIC_PROCESS                                           | GOBP_SECONDARY_METABOLITE_BIOSYNTHETIC_PROCESS                                           | 25/17872  | 1.51E-02 |
| GOBP_MOLTING_CYCLE                                                                       | GOBP_MOLTING_CYCLE                                                                       | 114/17872 | 1.52E-02 |
| GOBP_REGULATION_OF_MONONUCLEAR_CELL_MIGRATION                                            | GOBP_REGULATION_OF_MONONUCLEAR_CELL_MIGRATION                                            | 116/17872 | 1.55E-02 |
| GOBP_NUCLEOTIDE_BINDING_DOMAIN LEUCINE RICH REPEAT CONTAINING RECEPTOR SIGNALING_PATHWAY | GOBP_NUCLEOTIDE_BINDING_DOMAIN LEUCINE RICH REPEAT CONTAINING RECEPTOR SIGNALING_PATHWAY | 165/17872 | 1.55E-02 |
| GOBP_CELLULAR_RESPONSE_TO_INTERFERON_GAMMA                                               | GOBP_CELLULAR_RESPONSE_TO_INTERFERON_GAMMA                                               | 117/17872 | 1.55E-02 |
| GOBP_POSITIVE_REGULATION_OF_CYTOKINE_PRODUCTION_INVOLVED_IN_INFLAMMATORY_RESPONSE        | GOBP_POSITIVE_REGULATION_OF_CYTOKINE_PRODUCTION_INVOLVED_IN_INFLAMMATORY_RESPONSE        | 27/17872  | 1.61E-02 |
| GOBP_CELL_CELL_ADHESION_MEDIATED_BY_CADHERIN                                             | GOBP_CELL_CELL_ADHESION_MEDIATED_BY_CADHERIN                                             | 28/17872  | 1.68E-02 |
| GOBP_REGULATION_OF_HAIR_CYCLE                                                            | GOBP_REGULATION_OF_HAIR_CYCLE                                                            | 18/17872  | 1.68E-02 |
| GOBP_GLAND_MORPHOGENESIS                                                                 | GOBP_GLAND_MORPHOGENESIS                                                                 | 123/17872 | 1.68E-02 |
| GOBP_POSITIVE_REGULATION_OF_DEFENSE_RESPONSE                                             | GOBP_POSITIVE_REGULATION_OF_DEFENSE_RESPONSE                                             | 288/17872 | 1.71E-02 |
| GOBP_L_GLUTAMATE_TRANSMEMBRANE_TRANSPORT                                                 | GOBP_L_GLUTAMATE_TRANSMEMBRANE_TRANSPORT                                                 | 29/17872  | 1.71E-02 |
| GOBP_REGULATION_OF_EPITHELIAL_CELL_MIGRATION                                             | GOBP_REGULATION_OF_EPITHELIAL_CELL_MIGRATION                                             | 291/17872 | 1.74E-02 |
| GOBP_INTERLEUKIN_1_PRODUCTION                                                            | GOBP_INTERLEUKIN_1_PRODUCTION                                                            | 130/17872 | 1.84E-02 |
| GOBP_ANGIOGENESIS_INVOLVED_IN_WOUND_HEALING                                              | GOBP_ANGIOGENESIS_INVOLVED_IN_WOUND_HEALING                                              | 31/17872  | 1.84E-02 |
| GOBP_POSITIVE_REGULATION_OF_T_CELL_MIGRATION                                             | GOBP_POSITIVE_REGULATION_OF_T_CELL_MIGRATION                                             | 31/17872  | 1.84E-02 |
| GOBP_POSITIVE_REGULATION_OF_STRESS_ACTIVATED_PROTEIN_KINASE_SIGNALING_CASCADE            | GOBP_POSITIVE_REGULATION_OF_STRESS_ACTIVATED_PROTEIN_KINASE_SIGNALING_CASCADE            | 133/17872 | 1.89E-02 |
| GOBP_NEGATIVE_REGULATION_OF_CELL_JUNCTION_ASSEMBLY                                       | GOBP_NEGATIVE_REGULATION_OF_CELL_JUNCTION_ASSEMBLY                                       | 32/17872  | 1.91E-02 |
| GOBP_NEURON_DEATH_IN_RESPONSE_TO_OXIDATIVE_STRESS                                        | GOBP_NEURON_DEATH_IN_RESPONSE_TO_OXIDATIVE_STRESS                                        | 33/17872  | 2.00E-02 |
| GOBP_RESPONSE_TO_INTERFERON_GAMMA                                                        | GOBP_RESPONSE_TO_INTERFERON_GAMMA                                                        | 139/17872 | 2.06E-02 |
| GOBP_POSITIVE_REGULATION_OF_LEUKOCYTE_MIGRATION                                          | GOBP_POSITIVE_REGULATION_OF_LEUKOCYTE_MIGRATION                                          | 141/17872 | 2.09E-02 |
| GOBP_REGULATION_OF_JNK_CASCADE                                                           | GOBP_REGULATION_OF_JNK_CASCADE                                                           | 141/17872 | 2.09E-02 |
| GOBP_POSITIVE_REGULATION_OF_INFLAMMATORY_RESPONSE                                        | GOBP_POSITIVE_REGULATION_OF_INFLAMMATORY_RESPONSE                                        | 145/17872 | 2.23E-02 |
| GOBP_POSITIVE_REGULATION_OF_CYSINE_TYPE_ENDOPEPTIDASE_ACTIVITY                           | GOBP_POSITIVE_REGULATION_OF_CYSINE_TYPE_ENDOPEPTIDASE_ACTIVITY                           | 146/17872 | 2.24E-02 |
| GOBP_POSITIVE_REGULATION_OF_LYMPHOCTE_MIGRATION                                          | GOBP_POSITIVE_REGULATION_OF_LYMPHOCTE_MIGRATION                                          | 37/17872  | 2.32E-02 |
| GOBP_CELLULAR_RESPONSE_TO_CHEMICAL_STRESS                                                | GOBP_CELLULAR_RESPONSE_TO_CHEMICAL_STRESS                                                | 334/17872 | 2.42E-02 |
| GOBP_REGULATION_OF_RESPONSE_TO_BIOTIC_STIMULUS                                           | GOBP_REGULATION_OF_RESPONSE_TO_BIOTIC_STIMULUS                                           | 350/17872 | 2.84E-02 |
| GOBP_NEURON_DEATH                                                                        | GOBP_NEURON_DEATH                                                                        | 352/17872 | 2.86E-02 |
| GOBP_ASTROCYTE_DEVELOPMENT                                                               | GOBP_ASTROCYTE_DEVELOPMENT                                                               | 43/17872  | 2.94E-02 |
| GOBP_POSITIVE_REGULATION_OF_JUN_KINASE_ACTIVITY                                          | GOBP_POSITIVE_REGULATION_OF_JUN_KINASE_ACTIVITY                                          | 43/17872  | 2.94E-02 |
| GOBP_DEFENSE_RESPONSE_TO_BACTERIUM                                                       | GOBP_DEFENSE_RESPONSE_TO_BACTERIUM                                                       | 361/17872 | 3.00E-02 |
| GOBP_REGULATION_OF_T_CELL_MIGRATION                                                      | GOBP_REGULATION_OF_T_CELL_MIGRATION                                                      | 44/17872  | 3.00E-02 |
| GOBP_AMINO_ACID_IMPORT_ACROSS_PLASMA_MEMBRANE                                            | GOBP_AMINO_ACID_IMPORT_ACROSS_PLASMA_MEMBRANE                                            | 45/17872  | 3.10E-02 |
| GOBP_TISSUE_MIGRATION                                                                    | GOBP_TISSUE_MIGRATION                                                                    | 368/17872 | 3.13E-02 |
| GOBP_JNK_CASCADE                                                                         | GOBP_JNK_CASCADE                                                                         | 175/17872 | 3.19E-02 |
| GOBP_ACID_SECRETION                                                                      | GOBP_ACID_SECRETION                                                                      | 47/17872  | 3.19E-02 |
| GOBP_MEMBRANE_PROTEIN_ECTODOMAIN_PROTEOLYSIS                                             | GOBP_MEMBRANE_PROTEIN_ECTODOMAIN_PROTEOLYSIS                                             | 47/17872  | 3.19E-02 |
| GOBP_PHENOL_CONTAINING_COMPOUND_BIOSYNTHETIC_PROCESS                                     | GOBP_PHENOL_CONTAINING_COMPOUND_BIOSYNTHETIC_PROCESS                                     | 47/17872  | 3.19E-02 |
| GOBP_SENSORY_PERCEPTION_OF_MECHANICAL_STIMULUS                                           | GOBP_SENSORY_PERCEPTION_OF_MECHANICAL_STIMULUS                                           | 177/17872 | 3.25E-02 |
| GOBP_REGULATION_OF_RESPONSE_TO_CYTOKINE_STIMULUS                                         | GOBP_REGULATION_OF_RESPONSE_TO_CYTOKINE_STIMULUS                                         | 178/17872 | 3.27E-02 |
| GOBP_PROGRAMMED_NECROTIC_CELL_DEATH                                                      | GOBP_PROGRAMMED_NECROTIC_CELL_DEATH                                                      | 48/17872  | 3.32E-02 |
| GOBP_RESPONSE_TO_NICOTINE                                                                | GOBP_RESPONSE_TO_NICOTINE                                                                | 49/17872  | 3.32E-02 |
| GOBP_REGULATION_OF_MORPHOGENESIS_OF_A_BRANCHING_STRUCTURE                                | GOBP_REGULATION_OF_MORPHOGENESIS_OF_A_BRANCHING_STRUCTURE                                | 51/17872  | 3.55E-02 |
| GOBP_REGULATION_OF_ADAPTIVE_IMMUNE_RESPONSE                                              | GOBP_REGULATION_OF_ADAPTIVE_IMMUNE_RESPONSE                                              | 188/17872 | 3.62E-02 |
| GOBP_TUMOR_NECROSIS_FACTOR_SUPERFAMILY_CYTOKINE_PRODUCTION                               | GOBP_TUMOR_NECROSIS_FACTOR_SUPERFAMILY_CYTOKINE_PRODUCTION                               | 188/17872 | 3.62E-02 |
| GOBP_DEFENSE_RESPONSE_TO_FUNGUS                                                          | GOBP_DEFENSE_RESPONSE_TO_FUNGUS                                                          | 53/17872  | 3.72E-02 |
| GOBP_AMINO_ACID_IMPORT                                                                   | GOBP_AMINO_ACID_IMPORT                                                                   | 54/17872  | 3.82E-02 |
| GOBP_POSITIVE_REGULATION_OF_PEPTIDASE_ACTIVITY                                           | GOBP_POSITIVE_REGULATION_OF_PEPTIDASE_ACTIVITY                                           | 195/17872 | 3.89E-02 |
| GOBP_MONONUCLEAR_CELL_MIGRATION                                                          | GOBP_MONONUCLEAR_CELL_MIGRATION                                                          | 19/17872  | 4.08E-02 |
| GOBP_MEMBRANE_PROTEIN_PROTEOLYSIS                                                        | GOBP_MEMBRANE_PROTEIN_PROTEOLYSIS                                                        | 58/17872  | 4.19E-02 |
| GOBP_REGULATION_OF_STRESS_ACTIVATED_PROTEIN_KINASE_SIGNALING_CASCADE                     | GOBP_REGULATION_OF_STRESS_ACTIVATED_PROTEIN_KINASE_SIGNALING_CASCADE                     | 203/17872 | 4.19E-02 |
| GOBP_RESPIRATORY_SYSTEM_DEVELOPMENT                                                      | GOBP_RESPIRATORY_SYSTEM_DEVELOPMENT                                                      | 203/17872 | 4.19E-02 |
| GOBP_NEGATIVE_REGULATION_OF_FAT_CELL_DIFFERENTIATION                                     | GOBP_NEGATIVE_REGULATION_OF_FAT_CELL_DIFFERENTIATION                                     | 59/17872  | 4.20E-02 |
| GOBP_POSITIVE_REGULATION_OF_NUCLEAR_DIVISION                                             | GOBP_POSITIVE_REGULATION_OF_NUCLEAR_DIVISION                                             | 59/17872  | 4.20E-02 |
| GOBP_SECONDARY_METABOLIC_PROCESS                                                         | GOBP_SECONDARY_METABOLIC_PROCESS                                                         | 59/17872  | 4.20E-02 |
| GOBP_REGULATION_OF_JUN_KINASE_ACTIVITY                                                   | GOBP_REGULATION_OF_JUN_KINASE_ACTIVITY                                                   | 60/17872  | 4.30E-02 |
| GOBP_POSITIVE_REGULATION_OF_EPITHELIAL_CELL_PROLIFERATION                                | GOBP_POSITIVE_REGULATION_OF_EPITHELIAL_CELL_PROLIFERATION                                | 209/17872 | 4.30E-02 |
| GOBP_WOUND_HEALING                                                                       | GOBP_WOUND_HEALING                                                                       | 431/17872 | 4.30E-02 |
| GOBP_CYTOPLASMIC_PATTERN_RECOGNITION_RECEPTOR_SIGNALING_PATHWAY                          | GOBP_CYTOPLASMIC_PATTERN_RECOGNITION_RECEPTOR_SIGNALING_PATHWAY                          | 61/17872  | 4.30E-02 |
| GOBP_RESPONSE_TO_OXIDATIVE_STRESS                                                        | GOBP_RESPONSE_TO_OXIDATIVE_STRESS                                                        | 436/17872 | 4.30E-02 |
| GOBP_POSITIVE_REGULATION_OF_INTERLEUKIN_1_BETA_PRODUCTION                                | GOBP_POSITIVE_REGULATION_OF_INTERLEUKIN_1_BETA_PRODUCTION                                | 62/17872  | 4.30E-02 |
| GOBP_POSITIVE_REGULATION_OF_INTERLEUKIN_8_PRODUCTION                                     | GOBP_POSITIVE_REGULATION_OF_INTERLEUKIN_8_PRODUCTION                                     | 62/17872  | 4.30E-02 |
| GOBP_REGULATION_OF_SYNAPSE_STRUCTURE_OR_ACTIVITY                                         | GOBP_REGULATION_OF_SYNAPSE_STRUCTURE_OR_ACTIVITY                                         | 213/17872 | 4.30E-02 |
| GOBP_ACIDIC_AMINO_ACID_TRANSPORT                                                         | GOBP_ACIDIC_AMINO_ACID_TRANSPORT                                                         | 63/17872  | 4.30E-02 |
| GOBP_INTERLEUKIN_2_PRODUCTION                                                            | GOBP_INTERLEUKIN_2_PRODUCTION                                                            | 63/17872  | 4.30E-02 |
| GOBP_LYMPHOCTE_CHEMOTAXIS                                                                | GOBP_LYMPHOCTE_CHEMOTAXIS                                                                | 63/17872  | 4.30E-02 |
| GOBP_REGULATION_OF_LYMPHOCTE_MIGRATION                                                   | GOBP_REGULATION_OF_LYMPHOCTE_MIGRATION                                                   | 63/17872  | 4.30E-02 |
| GOBP_POSITIVE_REGULATION_OF_RESPONSE_TO_EXTERNAL_STIMULUS                                | GOBP_POSITIVE_REGULATION_OF_RESPONSE_TO_EXTERNAL_STIMULUS                                | 441/17872 | 4.30E-02 |
| GOBP_RESPONSE_TO_FUNGUS                                                                  | GOBP_RESPONSE_TO_FUNGUS                                                                  | 64/17872  | 4.36E-02 |
| GOBP_POSITIVE_REGULATION_OF_CELL_ADHESION                                                | GOBP_POSITIVE_REGULATION_OF_CELL_ADHESION                                                | 446/17872 | 4.38E-02 |
| GOBP_REGULATION_OF_LEUKOCYTE_MIGRATION                                                   | GOBP_REGULATION_OF_LEUKOCYTE_MIGRATION                                                   | 219/17872 | 4.38E-02 |
| GOBP_REGULATION_OF_MORPHOGENESIS_OF_AN_EPITHELIUM                                        | GOBP_REGULATION_OF_MORPHOGENESIS_OF_AN_EPITHELIUM                                        | 65/17872  | 4.38E-02 |
| GOBP_POSITIVE_REGULATION_OF_ERK1_AND_ERK2_CASCADE                                        | GOBP_POSITIVE_REGULATION_OF_ERK1_AND_ERK2_CASCADE                                        | 223/17872 | 4.44E-02 |
| GOBP_CELLULAR_RESPONSE_TO_RETINOIC_ACID                                                  | GOBP_CELLULAR_RESPONSE_TO_RETINOIC_ACID                                                  | 67/17872  | 4.44E-02 |
| GOBP_ENDOTHELIAL_CELL_APOPTOTIC_PROCESS                                                  | GOBP_ENDOTHELIAL_CELL_APOPTOTIC_PROCESS                                                  | 67/17872  | 4.44E-02 |
| GOBP_L_ALPHA_AMINO_ACID_TRANSMEMBRANE_TRANSPORT                                          | GOBP_L_ALPHA_AMINO_ACID_TRANSMEMBRANE_TRANSPORT                                          | 67/17872  | 4.44E-02 |
| GOBP_NECROTIC_CELL_DEATH                                                                 | GOBP_NECROTIC_CELL_DEATH                                                                 | 67/17872  | 4.44E-02 |
| GOBP_T_CELL_MIGRATION                                                                    | GOBP_T_CELL_MIGRATION                                                                    | 67/17872  | 4.44E-02 |
| GOBP_REGULATION_OF_PEPTIDASE_ACTIVITY                                                    | GOBP_REGULATION_OF_PEPTIDASE_ACTIVITY                                                    | 457/17872 | 4.46E-02 |
| GOBP_AMYLOID_PRECURSOR_PROTEIN_CATABOLIC_PROCESS                                         | GOBP_AMYLOID_PRECURSOR_PROTEIN_CATABOLIC_PROCESS                                         | 68/17872  | 4.46E-02 |
| GOBP_PIGMENT_BIOSYNTHETIC_PROCESS                                                        | GOBP_PIGMENT_BIOSYNTHETIC_PROCESS                                                        | 68/17872  | 4.46E-02 |
| GOBP_L_AMINO_ACID_TRANSPORT                                                              | GOBP_L_AMINO_ACID_TRANSPORT                                                              | 69/17872  | 4.53E-02 |
| GOBP_NEGATIVE_REGULATION_OF_INTERLEUKIN_6_PRODUCTION                                     | GOBP_NEGATIVE_REGULATION_OF_INTERLEUKIN_6_PRODUCTION                                     | 69/17872  | 4.53E-02 |
| GOBP_REGULATION_OF_ENDOTHELIAL_CELL_MIGRATION                                            | GOBP_REGULATION_OF_ENDOTHELIAL_CELL_MIGRATION                                            | 231/17872 | 4.60E-02 |
| GOBP_POSITIVE_REGULATION_OF_PROTEIN_CATABOLIC_PROCESS                                    | GOBP_POSITIVE_REGULATION_OF_PROTEIN_CATABOLIC_PROCESS                                    | 234/17872 | 4.73E-02 |
| GOBP_POSITIVE_REGULATION_OF_INTERLEUKIN_1_PRODUCTION                                     | GOBP_POSITIVE_REGULATION_OF_INTERLEUKIN_1_PRODUCTION                                     | 73/17872  | 4.94E-02 |
| GOBP_IMMUNE_RESPONSE_REGULATING_SIGNALING_PATHWAY                                        | GOBP_IMMUNE_RESPONSE_REGULATING_SIGNALING_PATHWAY                                        | 479/17872 | 4.97E-02 |

**Table S2**

|                                                   | Description                                       | BgRatio   | p.adjust |
|---------------------------------------------------|---------------------------------------------------|-----------|----------|
| GOBP_VASCULAR_PROCESS_IN_CIRCULATORY_SYSTEM       | GOBP_VASCULAR_PROCESS_IN_CIRCULATORY_SYSTEM       | 263/17872 | 1.34E-02 |
| GOBP_REGULATION_OF_VASCULAR_PERMEABILITY          | GOBP_REGULATION_OF_VASCULAR_PERMEABILITY          | 48/17872  | 1.34E-02 |
| GOBP_REGULATION_OF_SKELETAL_MUSCLE_ADAPTATION     | GOBP_REGULATION_OF_SKELETAL_MUSCLE_ADAPTATION     | 14/17872  | 3.68E-02 |
| GOBP_VASCULAR_TRANSPORT                           | GOBP_VASCULAR_TRANSPORT                           | 87/17872  | 3.68E-02 |
| GOBP_POSITIVE_REGULATION_OF_VASCULAR_PERMEABILITY | GOBP_POSITIVE_REGULATION_OF_VASCULAR_PERMEABILITY | 17/17872  | 3.68E-02 |
